# Supplementary material for: Genome-wide analysis of the superoxide dismutase (SOD) gene family in Zostera marina and expression profile analysis under temperature stress
Source: PeerJ. 2020 May 5;8:e9063. doi: 10.7717/peerj.9063 (PMC7207209; doi:10.7717/peerj.9063)
Supplement: Supplemental Information 1 [file peerj-08-9063-s001.xlsx]

## Sheet: Sheet1
Species	Gene ID	Gene name	Seq
Zostera marina	Zosma5g01030.1	ZmCZSOD-1	MVKAVAVLTGSQGVQGTVFFDQEAENGPTVVNASLTGLKPGDHGFHIHALGDTTNGCMSTGPHFNPHGKVHGSPLDEIRHAGDLGNVTAKEDGTVNFTTTDTQIPLLGPLSIIGRAVVVHAESDDLGKGGHELSLSTGNAGGRVACGVIGLKG*
	Zosma16g01180.1	ZmCZSOD-2	MVIGTVKGVALISSPGGGGDGVQGSIQFVQDMRTGHTQVTGEITGLTQGLHGFHVHAYGDTTNGCMSTGPHFNPTNKSHGGPSDGERHAGDLGNVVAGSDGIARIRIKDSQIPLIGPNSIVGRAVVVHADPDDLGRGGHQLSKSTGNAGARVGCGIIGLQSAV*
	Zosma16g00950.1	ZmFeSOD-3	MSFQHLQISPAVVSYRRVDSPKSPTCRPKYPQVNTVNLHRSWKSTKVVAYYGLTSPPFQLDALEPYMSQKTLEIHWGKQHQSYVDGLNKQIANSPLYGYTLEELVKVSYNNGNPFPEFNNAAQLWNHDFFWESLQPNGVKMPWGGFLEQIEKDFGSFSNFKENFVAEAMSLFGSGWVWLFLKKTDKKLVVAKTSNAINPLVWGDIPILSLDMWEHAYYQDYKDDKEKYVNTFINNLVSWHSATARMARAEAFVNLGEPKIPVA*
	Zosma106g00140.1	ZmFeSOD-4	MHGAVIASLSPSTSSSSSSLYPALIPFSGCISLTRQCKTHKVTRRRRAASITAQIELKPPPYSLNSLEPHMSSQTLEYHWGRHHKNHVEGLNRQIVGTELDAVSLEDIITVSYNRGNPLPAFNNASQIWNHDFFWNSMKPDGGGHPSGVLLELIERDFGSYESMLKEFKHAALNQFGSGWVWLAYKANKLDVGNAVNPFPSEKDNKLVVAKTPNAINPLVWDYSPILAIDLWEHAYCLDHENRREEYISIFMEKLVSWDVVSSRLEIAMERAAERAREKDTKEENEHTQGDDEGEEMYLDSENEDSEAE*
	Zosma270g00070.1	ZmMnSOD-5	MSLLVDPCCCKTTLTSSRFFGIPTSAMSMRAVFAKNKTRGLGFGLRQVRAMQTVTLPDLDYDFSALEPTINGEIMQIHHQKHHRAYVTNYNKALEQLEEAIGKGDSSKVVGLQGAIKFNGGGHVNHSIFWKNLAPKKDGGGEAPHQSLGWAIDTSFGSLDNLMKKINADGAALQGSGWVWLAYDKELKNLKVETTPNQDPLITKGQNLVPLLGIDVWEHAYYLQYQNMRPDYLKNIWDVINWKYASQVYEKESA*
Arabidopsis thaliana	AT5G18100.1	AtCZSOD-1	MEAPRGNLRAVALIAGDNNVRGCLQFVQDISGTTHVTGKISGLSPGFHGFHIHSFGDTTNGCISTGPHFNPLNRVHGPPNEEERHAGDL GNILAGSNGVAEILIKDKHIPLSGQYSILGRAVVVHADPDDLGKGGHKLSKSTGNAGSRVGCGIIGLQSSADAKL*
	AT1G08830.1	AtCZSOD-2	MAKGVAVLNSSEGVTGTIFFTQEGDGVTTVSGTVSGLKPGLHGFHVHALGDTTNGCMSTGPHFNPDGKTHGAPEDANRHAGDLGNITVG DDGTATFTITDCQIPLTGPNSIVGRAVVVHADPDDLGKGGHELSLATGNAGGRVACGIIGLQG*
	AT1G12520.1	AtCZSOD-3	MASILRSVATTSAVVAAASAIPIAIAFSSSSSSSSTNPKSQSLNFSFLSRSSPRLLGLSRSFVSSPMATALTSDRNLHQEDRAMPQLLT EFMVDMTCEGCVNAVKNKLETIEGIEKVEVDLSNQVVRILGSSPVKAMTQALEQTGRKARLIGQGVPQDFLVSAAVAEFKGPDIFGVVRFAQVSMELARI EANFTGLSPGTHSWCINEYGDLTNGAASTGSLYNPFQDQTGTEPLGDLGTLEADKNGEAFYSGKKEKLKVADLIGRAVVVYKTDDNKSGPGLTAAVIARS AGVGENYKKLCSCDGTVIWEATNSDFVASKV*
	AT2G28190.1	AtCZSOD-4	MAATNTILAFSSPSRLLIPPSSNPSTLRSSFRGVSLNNNNLHRLQSVSFAVKAPSKALTVVSAAKKAVAVLKGTSDVEGVVTLTQDDSG PTTVNVRITGLTPGPHGFHLHEFGDTTNGCISTGPHFNPNNMTHGAPEDECRHAGDLGNINANADGVAETTIVDNQIPLTGPNSVVGRAFVVHELKDDLG KGGHELSLTTGNAGGRLACGVIGLTPL*
	AT3G10920.1	AtMnSOD-5	MAIRCVASRKTLAGLKETSSRLLRIRGIQTFTLPDLPYDYGALEPAISGEIMQIHHQKHHQAYVTNYNNALEQLDQAVNKGDASTVVKL QSAIKFNGGGHVNHSIFWKNLAPSSEGGGEPPKGSLGSAIDAHFGSLEGLVKKMSAEGAAVQGSGWVWLGLDKELKKLVVDTTANQDPLVTKGGSLVPLV GIDVWEHAYYLQYKNVRPEYLKNVWKVINWKYASEVYEKENN*
	AT3G56350.1	AtMnSOD-6	MTTTVIIIIFVAIFATTLHDARGATMEPCLESMKTASLPDLPYAYDALEPAISEEIMRLHHQKHHQTYVTQYNKALNSLRSAMADGDHS SVVKLQSLIKFNGGGHVNHAIFWKNLAPVHEGGGKPPHDPLASAIDAHFGSLEGLIQKMNAEGAAVQGSGWVWFGLDRELKRLVVETTANQDPLVTKGSH LVPLIGIDVWEHAYYPQYKNARAEYLKNIWTVINWKYAADVFEKHTRDLDIN*
	AT4G25100.1	AtFeSOD-7	MAASSAVTANYVLKPPPFALDALEPHMSKQTLEFHWGKHHRAYVDNLKKQVLGTELEGKPLEHIIHSTYNNGDLLPAFNNAAQAWNHEF FWESMKPGGGGKPSGELLALLERDFTSYEKFYEEFNAAAATQFGAGWAWLAYSNEKLKVVKTPNAVNPLVLGSFPLLTIDVWEHAYYLDFQNRRPDYIKT FMTNLVSWEAVSARLEAAKAASA*
	AT5G51100.1	AtFeSOD-8	MMNVAVTATPSSLLYSPLLLPSQGPNRRMQWKRNGKRRLGTKVAVSGVITAGFELKPPPYPLDALEPHMSRETLDYHWGKHHKTYVENL NKQILGTDLDALSLEEVVLLSYNKGNMLPAFNNAAQAWNHEFFWESIQPGGGGKPTGELLRLIERDFGSFEEFLERFKSAAASNFGSGWTWLAYKANRLD VANAVNPLPKEEDKKLVIVKTPNAVNPLVWDYSPLLTIDTWEHAYYLDFENRRAEYINTFMEKLVSWETVSTRLESAIARAVQREQEGTETEDEENPDDE VPEVYLDSDIDVSEVD*
	AT5G23310.1	AtFeSOD-9	MSSCVVTTSCFYTISDSSIRLKSPKLLNLSNQQRRRSLRSRGGLKVEAYYGLKTPPYPLDALEPYMSRRTLEVHWGKHHRGYVDNLNKQ LGKDDRLYGYTMEELIKATYNNGNPLPEFNNAAQVYNHDFFWESMQPGGGDTPQKGVLEQIDKDFGSFTNFREKFTNAALTQFGSGWVWLVLKREERRLE VVKTSNAINPLVWDDIPIICVDVWEHSYYLDYKNDRAKYINTFLNHLVSWNAAMSRMARAEAFVNLGEPNIPIA*
Oryza sativa L.	LOC_Os03g11960.1	OsCZSOD-1	MAGKAGGLKGVALIGGAGGNSAVAGALHFFQDPSTGYTEVRGRVTGLAPGLHGFHIHSFGDTTNGCNSTGPHFNPHNKSHGAPS DDERHVGDLGNIVANKDGVADIFIKDLQISLSGPHSILGRAVVVHADSDDLGRGGHELSKTTGNAGARIGCGIIGLRSAV*
	LOC_Os03g22810.1	OsCZSOD-2	MVQVISDELRLSPLTGRALNTGQRRIYPVVPNYLDTGSSAKELGVTERRQSVTLGARALNVGWWLQLQAASLTTNTTAHRWREG NLPEAPDSKPAGVASPPPSSSSSSPRGSPEITLTMVKAVVVLGSSEIVKGTIHFVQEGDGPTTVTGSVSGLKPGLHGFHIHALGDTTNGCMSTGPHYNPA GKEHGAPEDETRHAGDLGNVTAGEDGVANIHVVDSQIPLTGPNSIIGRAVVVHADPDDLGKGGHELSKTTGNAGGRVACGIIGLQG*
	LOC_Os04g48410.1	OsCZSOD-3	MVGFLRALTAASAVPAAAAVAAVALSTNSSSSSRLRLPSPASLPSLSSAYAAAPASGSARKPNAVPPMAAAAATADLSAAADKG AALPELMTEFMVDMKCDGCVTAVKNKFQTLEGIKNIEVDLNNQVVRVLGSLPVNTMLDTLHQTGRDARLIGQGNPNDFLVSAAVAEFKGPVIFGVVRLAQ VNMELAIVEATFSGLSPGKHGWSINEFGDLTRGAESTGKVYNPSDYRSNKPLGDLGTLEAGEKGEAQFSASKEKLKVVDLIGRSIALYATEDRSDPGIAA AVIARSAGVGENYKKLCTCDGVTIWESS*
	LOC_Os05g25850.1	OsMnSOD-4	MALRTLASRKTLAAAALPLAAAAAARGVTTVALPDLPYDYGALEPAISGEIMRLHHQKHHATYVANYNKALEQLDAAVAKGDAP AIVHLQSAIKFNGGGHVNHSIFWNNLKPISEGGGDPPHAKLGWAIDEDFGSFEALVKKMSAEGAALQGSGWVWLALDKEAKKLSVETTANQDPLVTKGAN LVPLLGIDVWEHAYYLQYKNVRPDYLSNIWKVMNWKYAGEVYENATA*
	LOC_Os06g02500.1	OsFeSOD-5	MAFATLVGVGGLSPALFSPSRPLSCSSSTSVSAPFILRAGGGGDARRHGLRRLVTPLRGSACRGESTNSRVLQCANEANVVTED DIVNDGIDDETASDAEMDEDAEANGDESSGTDEDASVSWIEQQPLPYPSDALEPYISKETVEQHWGVHQNIHVERLNGMIGGSEWEGMSLGQMMLSSFNE GREAPHPPFFHAAQIWNHDFYWRSMQPGGGGKPPERLLKFINRDFGSYDGMIRQFMDAASTQFGSGWVWLCYKTSKLPHVKSRSPIPSDNYGRLVISKSP NAINPLVWGHSPLLAIDLWEHAYYLDYEDRRSDYVSTFLEKLVSWETVESRLKKAVQRAVERDEYVSTKHIRKQLLARAKSQIRAMPQQVNGDAREQTSG QEKSLGV*
	LOC_Os06g05110.1	OsFeSOD-6	MAAFASALRVLPSPPAAVPRRLRSREQRQGCRSRRYSKVVAYYALTTPPYKLDALEPYISKRTVELHWGKHQQDYVDSLNKQLA TSMFYGYTLEELIKEAYNNGNPLPEYNNAAQVWNHHFFWESMQPEGGGSPGRGVLQQIEKDFGSFTNFREEFIRSALSLLGSGWVWLVLKRKERKFSVVH TQNAISPLALGDIPLINLDLWEHAYYLDYKDDRRMYVTNFIDHLVSWDTVTLRMMRAEAFVNLGEPNIPVA*
	LOC_Os07g46990.1	OsCZSOD-7	MVKAVAVLASSEGVKGTIFFSQEGDGPTSVTGSVSGLKPGLHGFHVHALGDTTNGCMSTGPHFNPTGKEHGAPQDENRHAGDLG NITAGADGVANVNVSDSQIPLTGAHSIIGRAVVVHADPDDLGKGGHELSKTTGNAGGRVACGIIGLQG*
	LOC_Os08g44770.1	OsCZSOD-8	MQAILAAAMAAQTLLFSATAPPASLFQSPSSARPFHSLRLAAGPAGAAAARALVVADATKKAVAVLKGTSQVEGVVTLTQDDQG PTTVNVRVTGLTPGLHGFHLHEFGDTTNGCISTGPHFNPNNLTHGAPEDEVRHAGDLGNIVANAEGVAEATIVDKQIPLSGPNSVVGRAFVVHELEDDLG KGGHELSLSTGNAGGRLACGVVGLTPL*
Spirodela polyrhiza	Spipo17G0006000	SpFeSOD-1	MSSSSSRGTAQLELKRPPYPLDALEPYMSQKTLELHWGKHHRGYVDNLNKQIAGTDLDGSTLEEIIVKSYNEGRLLPTFNNAAQA WRPVLLSSYKGKKKHDDEGNAMNPSASQEHNKLVVVQTPDAVNPLVLDFSPLLVVDVWEHAYYLDYQNRRPDFVSTFVEKLVSWDAASARLEEAIAQATH RGLFLSSSL*
	Spipo17G0006100	SpFeSOD-2	MAVSAALSSTSAAALPFRGGRIYPCSLRGPKSRATSSGSFRVTAQLELKAPPYPLDALEPYMSQKTLEFHWGKHHRGYVDNLNKQ IAGTDLDGLTLEEIVVKSYNAGSPLPTFNNAAQAWRPALLSLILIHIWNHDFFWTSIKPGGGGKPSGLLLELIERDFGSVDALLNEFKQAALTQFGSGWA WLGYRGGKLVVEKTPNAVNPLVSDYYPLLVVDVWEHAYYLDYQNRRPDFVSTFIEKLISWDAVSARLDEAIAQAS*
	Spipo17G0006200	SpFeSOD-3	MSSGSSPVQLELKPPPYPLDALEPYMSQKTLEFHWGKHHRGYVDNLNKQIAGTDLHGLALEEIIVKSYNAGSPLPTFNNAAQAWR PIWNHDFFWSSMKPGGGGEPSGLVLELIKRDFGSVEALLSEFKQAALTQFGSGWAWIGYKDGKIVVEKTANAVNPLVADYHPLLTVDVWEHAYYLDYQNR RPDFVSTFIEQLLSWDAVSARLDEAIAKGAKSA*
	Spipo17G0006300	SpFeSOD-4	MGATRFNQTGRLSIVMQRPHLLLVTAGRQISGDHPNAVARCRPRVTAQLELKAPPYSLDALEPYMSRETLEYHWGRHHRGYVDNL NKQISGTDLDGLALEEIVVRSYNRGNPLPTFNNAAQARRPLLISIFNNGSSYADFSMKPGGGGQPRGVLLELIERDFGSLEGLLNEFKQAALTQFDKANR LDVGNAVNPRPSEDDNKLVVQKSPNAVNPLVWDYHPLLVVDVWEHAYYLDYQNRRPEFVSTFVEKLISWDAVSARLDEAIARAAARAEEDERRREEEDEL VTDDGDAIEMYLDTENESEAE*
	Spipo22G0010500	SpCZSOD-5	MVKAVVVLKGADGASGTVFFSQDGDGPTTVTGTLQGLKPGLHGFHVHALGDTTNGCLSTGPHFNPAGKDHGAPEDEVRHAGDLGN VTVGEDGTANFTIVDGQIPLTGPNSIVGRAVVVHADPDDLGKASLE*
	Spipo24G0015500	SpCZSOD-6	MASGNIRGVALIAGDAAGVKGSLQFVQDVATGYTHVNGKITGLTPGFHGFHIHTFGDTTNGCNSTGPHFNPLNKQHGAPSDEIRH AGDLGNIVADQNGVADVCLKDLQISLSGPNSILGRAVVVHADPDDLGRGGHELSKATGNAGARIGCGIIGLQSAV*
	Spipo3G0003000	SpMnSOD-7	MAFCALVSKKALGSALRSGAADLGAGLCQVRRLQTFSLPDLSYDYGALEPAISGEIMKIHHQKHHQAYITNYNKALEQLDEAIQKG DTSKVVGLQSAIKFNGGGHINHSIFWKNLAPTNEGGGEPPKGALGWAIDTDFGSFEALIQKMSTEGAALQGSGWVWLALDKELKKVRIETTANQDPLVTK GLNLVPLLGIDVWEHAYYLQYKNVRPDYLKNIWKVINWKYASEVFDGEAA*
	Spipo4G0057200	SpFeSOD-8	YLPSLYLKRRDQLRGPPRTSRIVAFYGLTAPPYELDALEPYMSQKTLEIHWGKHHRAYVDNLNKQLANSPLYGLTLDELVKISYNN GNPLPEFNNAAQVWNHNFFWESMQPDGGYMPAAGLLQQIEKDFGSFQNFREKFITTAMSLFGSGWVWLVLKKEEKKLAVVRASNAVNPLVWGDIPIITLD MWEHSYYLDYRNDRGKYVNAFMDSLVSWQSATARMARAEAFVNLGEPKIPVA*
Zostera muelleri	maker-6482_37592--0.10-mRNA-1	ZmuCZSOD-1	MVKAVAVLTGSHGVKGTVCFVQEAENGPTTVNASLSGLTPGDHGFHVHALGDTTNGCMSTGPHFNPHGKVHGSPHDEIRHAGDLGNVTAKEDGTLDFTTTDNQIPLIGPLSIIGRAVVVHADPDDLGKGGHELSLSTGNAGGRVACGVIGLQG
	augustus_masked-16046_11119--0.0-mRNA-1	ZmuCZSOD-2	MATGTVKGVALISSPVGGGGGVQGSIQFVQDMRTGHTEVTGMITGLTQGLHGFHVHAYGDTTNGCMSTGPHFDPTNKSHGGPSDGERHAGDLGNVVAGSDGIARIWIKDSQIPLIGPNSILGRAVVVHADPDDLGRGGHELSKSTGNAGARVGCGNMF
	maker-1238_66824_1_56791--0.28-mRNA-1	ZmuCZSOD-3	MATGTVKGVALISSPVDGGGGVQGSIEFVQDMRTGHTEVTGKITGLTQGLHGFHVHAYGDTTNGCMSTGPHFNPTNKSHGGPSDKERHAGDLGNVVAGSDGIARIWIKDSQIPLSGPNSILGRAIVVHADTDDLGRGGHELSKSTGNAGARVGCGIIGLQSAV
	maker-10763_17785--0.7-mRNA-1 protein	ZmuCZSOD-4	MSTGPHFNPHGKVHGSPVDEIRHAGDLGNVTAKEDGTVDFTTTDSQDLLLFVSCLSGSIMQIPLIGPLSIIGRAVVVHADPDDLGKGGHELSLSTGNAGGRVACGVIGLQG
	maker-8236_15846--0.5-mRNA-1	ZmuFeSOD-5	MSSQTLEYHWGRHHKNYVEGLNRQIVGTELDAVSLEDIMTVSYNRGNPLPAFNNASQIWNHDFFWNSMKPGGGGHPSGVLLELIERDFGSYESMLKEFKRAALNQFGSSWVWLAYKANKLDVGNSVNPFPSEKDNKLVVIKTPNALNPFVWDYSPILAIDLWEHAYYLDHESRREEYILIFMEKLVSWDMVSSRLERAMERAAERASEKGTKEENDHTQGDNDAEEMYLDSENEDSEAE
	maker-3589_49129_1_42642--0.29-mRNA-1	ZmuFeSOD-6	MDNGALPLHFHYSTAVFFPNEQTNMSLQHLPVSPTAAFYHRIGCPKSPTCSPKYPQVSTVNLHRSRKSTKVVAYYGITSPPFQLGALEPYMSKKTLEIHWGKQHQSYVDRLNKQIANSPLYGYTLEELVKVSYNNGNPFPEFNNAAQLWNHDFFWESLQPNGVKMPWGGFLEQIEKDFGSFSNFKESFVEEAMSLFGSGWVWLFLKKTEKKLAVTKTSNAINPLVWGDIPILGLDMWEHAYYQDYKDDKEKYVNTLMNNLVSWHSATARMARAEAFVNLGEPKIPVA
	maker-5900_59627--0.31-mRNA-1	ZmuFeSOD-7	MSLQHLQVSPTAASYYRVGCPKSPTCSLKYPQVNTVNLHRSRKSTKVVAYYGLTSPPFQLDALEPYMSKKTLEIHWGKQHQSYVDRLNKQIANSPLYGYTLEELVKVSYNNGNPFPEFNNAAQLWNHDFFWESLQPNGVKMPWGGFLEQIEKDFGSFSNFKESFVEEAMSLFGSGWVWLFLKKTEKKLAVTKTSNAINPLVWGDIVTNTLFGYVGGKNITPTIKIIRHVYDDKEKYVNTFMNNLVSWHSATARMARAEAFVNLGEPKIPVA
	maker-7307_21762--0.6-mRNA-1	ZmuMnSOD-8	MSLLANPCCKTTLTSSHFFGIPASAMSMRAIFAKNKTRTLGTCQSLHFLEESCSHKSNDAPAFFIHDDDETCFFYNNHVDGGGEAPHQSLGWAIDTNFGSLENLMKKINADGAALQGSGWVWLAYDKELKNLKVETTPNQNKTRTLGGFGLRQVRAMQTVTLPDLDYDFSALEPTINGEIMQIHHQKHHRAYVTNYNKALEQLEEAISKGDSSKVVSLQGAIKFNGGGHVNHSIFWKNLAPTKDGGGEAPHQSLGWAIDTNFGSLEKLMKKINADGAALQGSGWVWLAYDKELKNLKVETTPNQDPLVTKGQNLVPLLGIDVWEHAYYLQYQNMRPDYLKNIWDVINWKYASQVYEKESA
