# Supplementary material for: Genome-wide analysis of the superoxide dismutase (SOD) gene family in Zostera marina and expression profile analysis under temperature stress
Source: PeerJ. 2020 May 5;8:e9063. doi: 10.7717/peerj.9063 (PMC7207209; doi:10.7717/peerj.9063)
Supplement: Supplemental Information 3 [file peerj-08-9063-s003.xlsx]

## Sheet: Sheet1
Gene ID		5'--3'
18sRNA	F	TGTTTGATGGTATCTTACTACTCGG
	R	CTGCCTTCCTTGGATGTGGT
ZmCZSOD-1	F	TGACCAAGAAGCGGAGAATG
	R	CCAATGACACCACAAGCAACT
ZmCZSOD-2	F	GGTGGAGATGGCGTTCAAG
	R	AACCAGCAACTACATTACCGAG
ZmFeSOD-3	F	CCGTCGTTTCCTACCGCC
	R	TTTGATGTTGCTTTCCCCAG
ZmFeSOD-4	F	CACTGGGGCAGACATCACAA
	R	AGAAGAACGCCAGAAGGGTG
ZmMnSOD-5	F	ACTTGGTGCCTTTATTGGGAA
	R	GTAGACCTGGCTGGCGT
