# Supplementary material for: Genome-wide analysis of the superoxide dismutase (SOD) gene family in Zostera marina and expression profile analysis under temperature stress
Source: PeerJ. 2020 May 5;8:e9063. doi: 10.7717/peerj.9063 (PMC7207209; doi:10.7717/peerj.9063)
Supplement: Supplemental Information 6 [file peerj-08-9063-s006.xlsx]

## Sheet: Sheet1
SeqName	Description	Length	E-Value	GO IDs	GO Names
ZmCZSOD-1	Superoxide dismutase [Cu-Zn]	153	2.00007e-104	GO:0004784 GO:0005737 GO:0016021 GO:0019430 GO:0046872 GO:0055114	F:superoxide dismutase activity; C:cytoplasm; C:integral component of membrane; P:removal of superoxide radicals; F:metal ion binding; P:oxidation-reduction process
ZmCZSOD-2	superoxide dismutase [Cu-Zn] 2	163	2.27865e-103	GO:0004784 GO:0005507 GO:0005615 GO:0019430 GO:0055114	F:superoxide dismutase activity; F:copper ion binding; C:extracellular space; P:removal of superoxide radicals; P:oxidation-reduction process
ZmFeSOD-3	superoxide dismutase [Fe] 2, chloroplastic	263	0	GO:0004784 GO:0019430 GO:0046872 GO:0055114	F:superoxide dismutase activity; P:removal of superoxide radicals; F:metal ion binding; P:oxidation-reduction process
ZmFeSOD-4	iron superoxide dismutase 1A	309	0	GO:0004784 GO:0019430 GO:0046872 GO:0055114	F:superoxide dismutase activity; P:removal of superoxide radicals; F:metal ion binding; P:oxidation-reduction process
ZmMnSOD-5	superoxide dismutase [Mn], mitochondrial	254	0	GO:0004784 GO:0019430 GO:0046872 GO:0055114	F:superoxide dismutase activity; P:removal of superoxide radicals; F:metal ion binding; P:oxidation-reduction process
