# Supplementary material for: Genome-wide analysis of the superoxide dismutase (SOD) gene family in Zostera marina and expression profile analysis under temperature stress
Source: PeerJ. 2020 May 5;8:e9063. doi: 10.7717/peerj.9063 (PMC7207209; doi:10.7717/peerj.9063)
Supplement: Supplemental Information 7 [file peerj-08-9063-s007.xlsx]

## Sheet: Sheet1
No.	E-value	Width	Motif ID	Gene ID	Protein sequence
1	9.38e-164	150	1	ZmFeSOD-3	YPQVNTVNLHRSWKSTKVVAYYGLTSPPFQLDALEPYMSQKTLEIHWGKQHQSYVDGLNKQIANSPLYGYTLEELVKVSYNNGNPFPEFNNAAQLWNHDFFWESLQPNGVKMPWGGFLEQIEKDFGSFSNFKENFVAEAMSLFGSGWVWL
2	1.7e-161	150	1	ZmFeSOD-4	TRQCKTHKVTRRRRAASITAQIELKPPPYSLNSLEPHMSSQTLEYHWGRHHKNHVEGLNRQIVGTELDAVSLEDIITVSYNRGNPLPAFNNASQIWNHDFFWNSMKPDGGGHPSGVLLELIERDFGSYESMLKEFKHAALNQFGSGWVWL
3	2e-148	136	2	ZmCZSOD-1	VQGTVFFDQEAENGPTVVNASLTGLKPGDHGFHIHALGDTTNGCMSTGPHFNPHGKVHGSPLDEIRHAGDLGNVTAKEDGTVNFTTTDTQIPLLGPLSIIGRAVVVHAESDDLGKGGHELSLSTGNAGGRVACGVI
4	2.2e-153	136	2	ZmCZSOD-2	VQGSIQFVQDMRTGHTQVTGEITGLTQGLHGFHVHAYGDTTNGCMSTGPHFNPTNKSHGGPSDGERHAGDLGNVVAGSDGIARIRIKDSQIPLIGPNSIVGRAVVVHADPDDLGRGGHQLSKSTGNAGARVGCGII
5	1.9e-36	34	3	ZmFeSOD-3	NAINPLVWGDIPILSLDMWEHAYYQDYKDDKEKY
6	7.2e-40	34	3	ZmFeSOD-4	NAINPLVWDYSPILAIDLWEHAYCLDHENRREEY
7	1.2e-28	34	3	ZmMnSOD-5	DPLITKGQNLVPLLGIDVWEHAYYLQYQNMRPDY
9	2.5e-24	23	4	ZmMnSOD-5	PTINGEIMQIHHQKHHRAYVTNY
10	3.9e-22	21	5	ZmFeSOD-3	FINNLVSWHSATARMARAEAF
11	3.3e-24	21	5	ZmFeSOD-4	FMEKLVSWDVVSSRLEIAMER
13	1.2e-20	21	6	ZmMnSOD-5	GWAIDTSFGSLDNLMKKINAD
14	1e-20	20	7	ZmFeSOD-3	QISPAVVSYRRVDSPKSPTC
15	4.4e-21	20	7	ZmMnSOD-5	CCKTTLTSSRFFGIPTSAMS
16	1.2e-22	20	8	ZmMnSOD-5	NIWDVINWKYASQVYEKESA
18	1.2e-21	20	9	ZmMnSOD-5	GAIKFNGGGHVNHSIFWKNL
